# Supplementary material for: The rational design of Cu2−xSe@(Co,Cu)Se2core–shell structures as bifunctional electrocatalysts for neutral-pH overall water splitting
Source: Royal Society of Chemistry journal article supplement (doi:10.1039/d0nr07897b), 2020-12-09
Supplement: d0nr07897b1.pdf [file d0nr07897b1.pdf]

**Rational design of  $\text{Cu}_{2-x}\text{Se}@\text{(Co,Cu)Se}_2$  core-shell structure as bifunctional electrocatalyst for neutral-pH overall water splitting**

Li Liu,<sup>\*a</sup> Xiao Yang,<sup>a</sup> Yuanqing Zhao,<sup>a</sup> Bingbing Yao,<sup>a</sup> Yanhua Hou<sup>\*b</sup> and Wensheng Fu<sup>\*a</sup>

<sup>a</sup>Chongqing Key Laboratory of Green Synthesis and Applications, College of Chemistry, Chongqing Normal University, Chongqing 401331, China

<sup>b</sup>Chongqing Engineering Research Center of Pharmaceutical Sciences, Chongqing Medical and Pharmaceutical College, Chongqing 401331, China

**Keywords:** Neutral electrolyte, overall water splitting, bifunctional electrocatalysts, core-shell structure, synergistic effect.

\*E-mail: liliu1208@163.com (L. Liu.)

\*E-mail: fuwensheng@cqu.edu.cn (W. Fu.)

\*E-mail: hyh9785@163.com (Y. Hou)

## Experimental section

**Chemicals and Materials:** Copper(II) Chloride Dihydrate ( $\text{CuCl}_2 \cdot 2\text{H}_2\text{O}$ , AR), Sodium hydroxide (NaOH, AR), sodium thiosulfate pentahydrate ( $\text{Na}_2\text{S}_2\text{O}_3 \cdot 5\text{H}_2\text{O}$ , AR), Sodium carbonate ( $\text{Na}_2\text{CO}_3$ , AR), ethyl alcohol ( $\text{C}_2\text{H}_5\text{OH}$ , AR), ethylene glycol ( $(\text{CH}_2\text{OH})_2$ , AR) were purchased from Chengdu Kelong Chemical Co., Ltd. L-Ascorbic acid (Vc, 99.99%), Cobalt chloride hexahydrate ( $\text{CoCl}_2 \cdot 6\text{H}_2\text{O}$ , 99%), Cobalt nitrate hexahydrate ( $\text{Co}(\text{NO}_3)_2 \cdot 6\text{H}_2\text{O}$ , 99%), Selenium (Se, 99.99%) were provided by Shanghai Macklin Biochemical Co., Ltd. Polyvinylpyrrolidone ( $(\text{C}_6\text{H}_9\text{NO})_n$ ,  $M_w = 40\text{K}$ ) was obtained from Shanghai Yuanye Bio-Technology Co., Ltd. Ammonia solution ( $\text{NH}_3 \cdot \text{H}_2\text{O}$ , AR) was obtained from Chuandong chemical. The commercial  $\text{RuO}_2$  was purchased from Sinopharm Group Chemical Reagent Co., Ltd. The commercial Pt/C was provided by Shanghai Aladdin Biochemical Technology Co., Ltd. In this experiment, all raw materials were not further purified, and deionized (DI) water ( $18.2 \text{ M}\Omega \cdot \text{cm}$ ) was used throughout the experiments.

**Prepare of 1.0 M phosphate-buffered solution (pH 7):** Firstly, 1mol/L  $\text{KH}_2\text{PO}_4$  and 1mol/L  $\text{K}_2\text{HPO}_4$  solution were prepared, respectively. Then, 610 mL 1mol/L  $\text{KH}_2\text{PO}_4$  solution was mixed with 390 mL 1mol/L  $\text{K}_2\text{HPO}_4$  solution. Finally, the pH meter was used to adjust the pH value (pH 7) of phosphate-buffered solution by adding strong acid or strong base solution.

**Synthesis of  $\text{Cu}_2\text{O}$  Nanocube:** The  $\text{Cu}_2\text{O}$  nanocube was synthesized by a familiar precipitation method. 0.171 g  $\text{CuCl}_2 \cdot 2\text{H}_2\text{O}$  and 0.556 g polyvinylpyrrolidone (PVP) were dissolved into 100 mL  $\text{H}_2\text{O}$  at  $80^\circ\text{C}$  under the magnetic stirring, then 15 ml (2 M) NaOH was added into the mixture. After stirring for 30 min, 10 mL (0.6 M) Vc was slowly added into above solution. Following that, stirring for another 5 min, the obtained solution was aged in an oil bath at  $80^\circ\text{C}$  for 2 h. The final product was centrifuged and washed several times with deionized water and absolute ethanol. After dried at  $60^\circ\text{C}$  for 12 h, the  $\text{Cu}_2\text{O}$  nanocube was obtained.

**Synthesis of  $\text{Cu}_2\text{O} @ (\text{Co,Cu})(\text{OH})_2$  intermediate:**  $\text{Cu}_2\text{O} @ (\text{Co,Cu})(\text{OH})_2$  intermediate was prepared by a "coordinating-etching-precipitating" strategy. Firstly, 0.333 g PVP was dissolved in 5 mL anhydrous ethanol. Secondly, add 5 mL (1.0 mM)  $\text{CoCl}_2 \cdot 6\text{H}_2\text{O}$  to above solution with magnetic stirring. Then 50 mg as-prepared  $\text{Cu}_2\text{O}$  nanocube was poured into the above mixture. After stirring of 10 min, 5 mL (1 M)  $\text{Na}_2\text{S}_2\text{O}_3 \cdot 5\text{H}_2\text{O}$  solution was poured into the mixture. Then the mixture was stirred for another 10 min. Finally, the core-shell  $\text{Cu}_2\text{O} @ (\text{Co,Cu})(\text{OH})_2$  intermediate was collected by centrifugation, washed with DI water and anhydrous ethanol for several times, and then dried at  $60^\circ\text{C}$  for 12 h.

**Synthesis of  $\text{Cu}_{2-x}\text{Se} @ (\text{Co,Cu})\text{Se}_2$  core-shell structure:** 50 mg as-prepared  $\text{Cu}_2\text{O} @ (\text{Co,Cu})(\text{OH})_2$  intermediate and 50 mg selenium were placed downstream and upstream of the graphite boat, respectively. Then put graphite boat in a tube furnace. The furnace was heated to  $500^\circ\text{C}$  at a heating rate of  $5^\circ\text{C}/\text{min}$  under a  $\text{N}_2$  atmosphere and kept at  $500^\circ\text{C}$  for 30 min. After natural cooling, the  $\text{Cu}_{2-x}\text{Se} @ (\text{Co,Cu})\text{Se}_2$  core-shell structure was obtained.

**Synthesis of  $\text{Cu}_{2-x}\text{Se}$ :** In a typical procedure, 50 mg as-prepared  $\text{Cu}_2\text{O}$  nanocube and 50 mg

selenium were placed downstream and upstream of the graphite boat, respectively. Then put graphite boat in a tube furnace. After calcined the graphite boat at 500 °C for 30 min under a N<sub>2</sub> atmosphere, the Cu<sub>2-x</sub>Se was obtained.

**Synthesis of CoSe<sub>2</sub>:** The CoSe<sub>2</sub> as contrast material was synthesized in two steps by general hydrothermal strategy and thermal decomposition. Firstly, add 12.5 mL Ammonia solution (AR) into 12.5 mL ethylene glycol (AR) to form a transparent solution. After stirring of 5 min, 5 mL (1M) Na<sub>2</sub>CO<sub>3</sub> was poured into the above mixture. Subsequently, 5 mL (1M) Co(NO<sub>3</sub>)<sub>2</sub>·6H<sub>2</sub>O was poured into in the admixture. After stirring for 20 min, the resulting uniform solution was maintained for 17 h at 170 °C in a 50 mL Teflon-lined autoclave. The product was washed with water and absolute ethanol several times. After dried for 12 h at 60 °C, 50 mg as-obtained precursor was heated at 800 °C for 2 hours. When naturally cooled to room temperature, 200 mg selenium was quickly mixed in the graphite boat. After the graphite boat was heated at 400 °C for 30 min under a N<sub>2</sub> atmosphere, the CoSe<sub>2</sub> was obtained.

**Characterization:** The powder X-ray diffractometer (Lab XRD-6100, Cu K $\alpha$  radiation ( $\lambda = 1.54184 \text{ \AA}$ )), Raman spectrometer equipped with argon (532 nm) laser in the wavenumber of 100-2000 cm<sup>-1</sup> (Horiba LabRAM HR Evolution) and X-ray photoelectron spectrometer (ESCALAB250), Brunauer-Emmett-Teller surface area analyzer (BET, 3H-2000PS1), Scanning Electron Microscope (JEOL JSM-7800F) and Transmission Electron Microscope (ThermoFisher Scientific, Talos F200s) were carried out to test the pure phase, component, valence states, surface area, morphology and structural features of as-prepared samples.

**Electrochemical characterization:** For the preparation of working electrode, 10 mg the as-obtained catalyst was well-dispersed in diluted Nafion alcohol solution consisting of 50  $\mu$ L Nafion and 450  $\mu$ L ethanol, followed by ultrasound for at least 30 min. Then, 10  $\mu$ L the catalyst ink was dropped onto the glass carbon electrode (GCE, 6 mm in diameter) as working electrode for HER and OER. Electrochemical measurements were taken on a CHI660E electrochemistry workstation at room temperature using a typical three-electron system in 1.0 M phosphate-buffered solution (PBS). The catalyst on GCE was used as the working electrode, graphite rod and Ag/AgCl (in KCl saturated) acted as the counter electrode and reference electrode, respectively. All the potentials reported in this work were normalized against that of the reversible hydrogen electrode (RHE) using equation:  $E_{\text{RHE}} = E_{\text{Ag/AgCl}} + 0.059\text{pH} + 0.197$ . Before HER and OER tests, the electrolyte was continuously degassed by bubbling pure H<sub>2</sub> and O<sub>2</sub> for at least 30 min to acquire gas saturation, respectively. And before recording the test results, the cyclic voltammetry (CV) was firstly measured for at least 10 cycles for the purpose of achieving the stable state. The linear sweep voltammogram (LSV) curves were measured at 2 mV/s with an  $iR$  corrected. The voltage scope of HER and OER measurement is -1~-0.6 V and 0.6~1.2 V, respectively. The Tafel plots were derived from the polarization curves as |potential| vs. |log  $j$ |. Then, the Tafel slope ( $b$ ) can be acquire by fitting the linear portion of Tafel plots to the Tafel equation ( $\eta = b \log(j) + a$ ). To

estimate the electrochemically effective surface area (ECSA), the electrochemical double-layer capacitance ( $C_{dl}$ ) was determined from the cyclic voltammetry (CV) curves measured in a non-faradic potential range (1.25~1.35 V vs RHE) with different scan rates ranging from 10~50 mV/s. The HER and OER durability were determined by the chronopotentiometric measurements at the current density of 10 and -10 mA/cm<sup>2</sup>, respectively, as well as the cyclic voltammetry (CV) for 2000 cycles. Electrochemical impedance spectroscopy (EIS) was obtained by applying an AC voltage with 5 mV amplitude in the frequency region of 10<sup>-2</sup>-10<sup>5</sup> Hz at open circuit voltage. And the Zview version 3.2c-software was used to parse the impedance data for OER and HER. For overall water splitting electrolysis, the catalyst ink was uniformly overlaid on carbon cloth (CC) with a cover area of 1cm<sup>2</sup> as working electrode. The loading mass of tested samples was controlled at 1± 0.1 mg/cm<sup>2</sup> as much as possible. A two-electrode configuration was assembled for electrochemical test, where as-prepared catalyst was used as both cathode and anode. For comparison, the two-electrode devices with commercial Pt/C and RuO<sub>2</sub> onto CC as the cathode and anode were also prepared. The LSV curves were performed in 1.0 M PBS at a scan rate of 2 mV/s. The long-term durability was tested by the chronopotentiometric measurement at the current density of 10 mA/cm<sup>2</sup> for 30h. All the potential in the paper, if not specified was recorded relative to the RHE and the current density was normalized to the geometrical surface area.

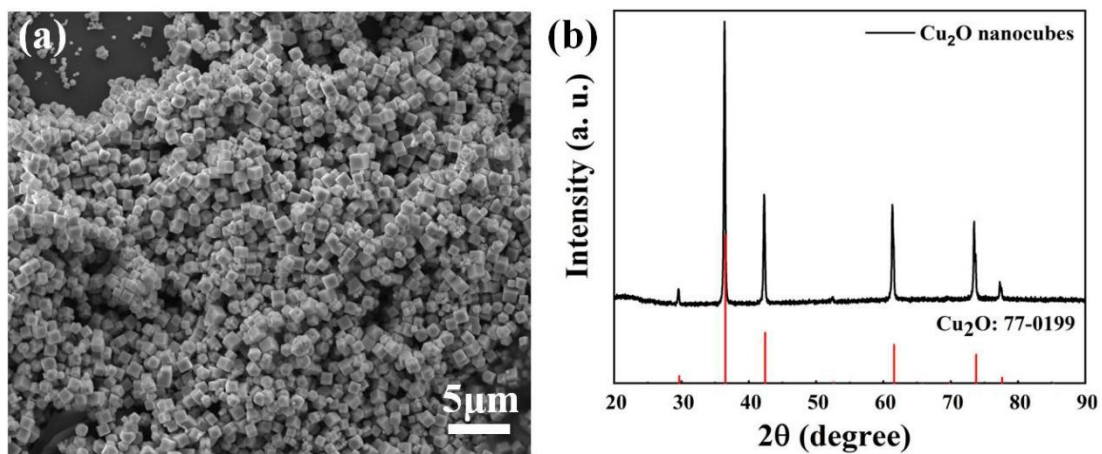

Figure S1. (a) SEM image of Cu<sub>2</sub>O nanocubes on a large scale. (b) XRD pattern of Cu<sub>2</sub>O nanocubes.

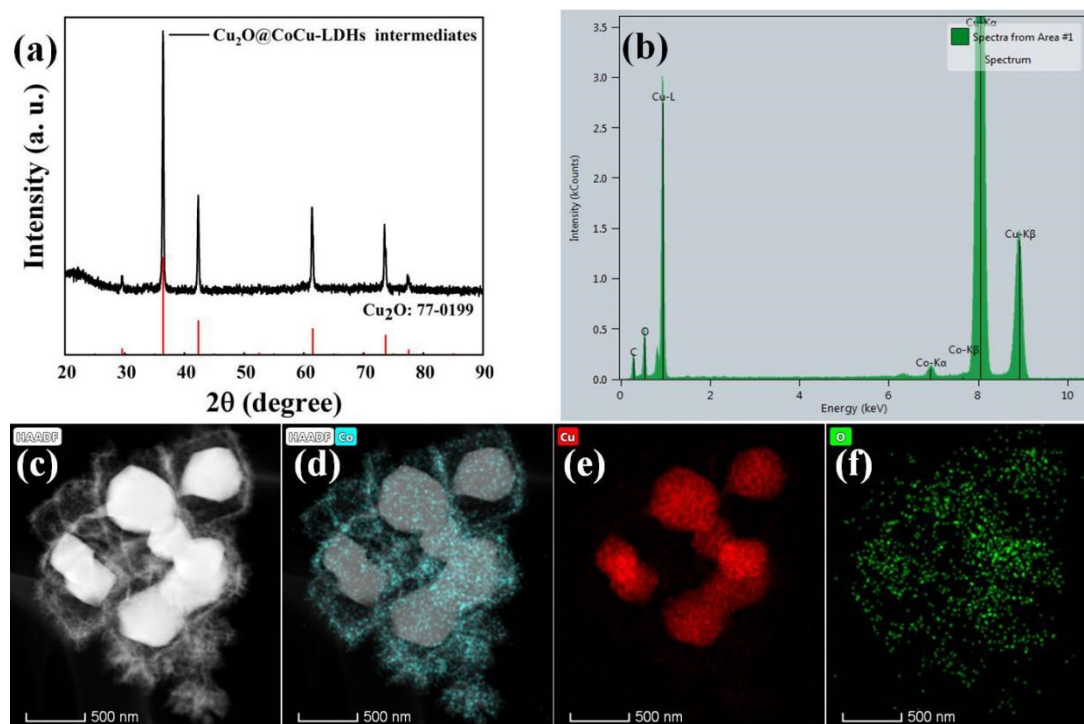

Figure S2. (a) XRD pattern, (b) EDX spectrum, (c) HAADF-STEM image and (d-f) EDX elemental mapping images of  $\text{Cu}_2\text{O}@(\text{Co,Cu})(\text{OH})_2$  intermediates.

Figure S2a displays the XRD pattern of  $\text{Cu}_2\text{O}@(\text{Co,Cu})(\text{OH})_2$  intermediates, which only exhibits the diffraction peaks of internal  $\text{Cu}_2\text{O}$  core (JCPDS No. 77-0199) without the diffraction peaks of  $(\text{Co,Cu})(\text{OH})_2$  shell. This result implies the amorphous  $(\text{Co,Cu})(\text{OH})_2$  phase. However, EDX spectrum in Figure S2b demonstrates that the  $\text{Cu}_2\text{O}@(\text{Co,Cu})(\text{OH})_2$  intermediate contains Cu, Co, O and C elements, wherein C element comes from air. In addition, HAADF-STEM image (Figure S2c) explicitly proves the unique core-shell structure, in which ultrathin  $(\text{Co,Cu})(\text{OH})_2$  nanosheets constitute the shell structure and  $\text{Cu}_2\text{O}$  nanocube gradually contracts to form a core. The fact is also verified by the elemental mapping images in Figure S2d-f.

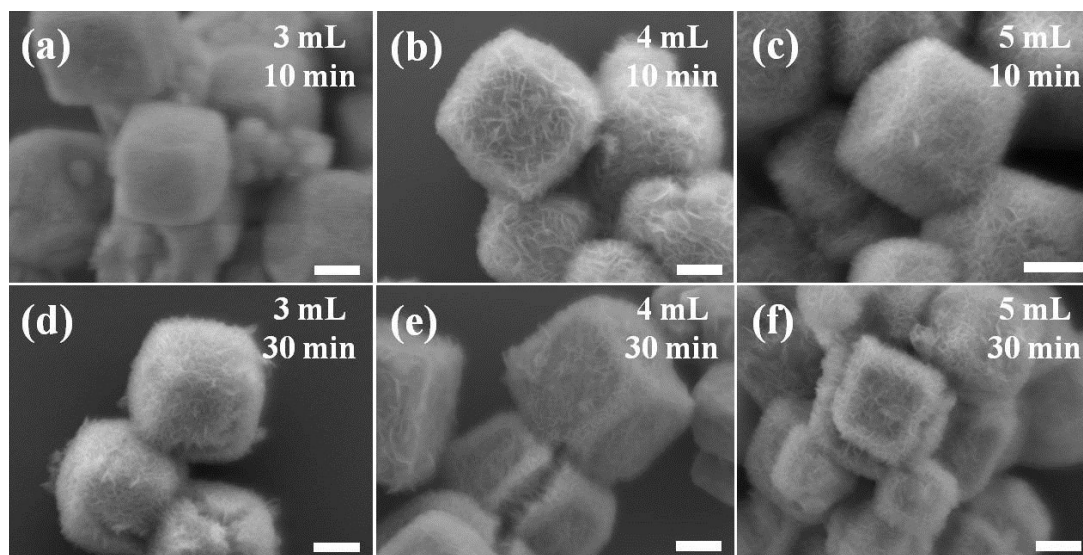

Figure S3. (a-f) The SEM images of  $\text{Cu}_2\text{O}@\text{(Co,Cu)(OH)}_2$  intermediate with different dosages of 1M  $\text{Na}_2\text{S}_2\text{O}_3$  and different reaction time. The scale bar is 500 nm.

Figure S3 displays that the  $\text{(Co,Cu)(OH)}_2$  nanosheets on the surface gradually become lush with the increase of the dosage of  $\text{Na}_2\text{S}_2\text{O}_3$ , while with the extension of reaction time, the thickness of sheet-like shell increases, meanwhile, the internal  $\text{Cu}_2\text{O}$  core continuously dissolves forming a unstable hollow-structure instead of a core-shell structure. It can be seen that the optimal experimental condition is 5 mL 1M  $\text{Na}_2\text{S}_2\text{O}_3$  with the reaction time of 10 min.

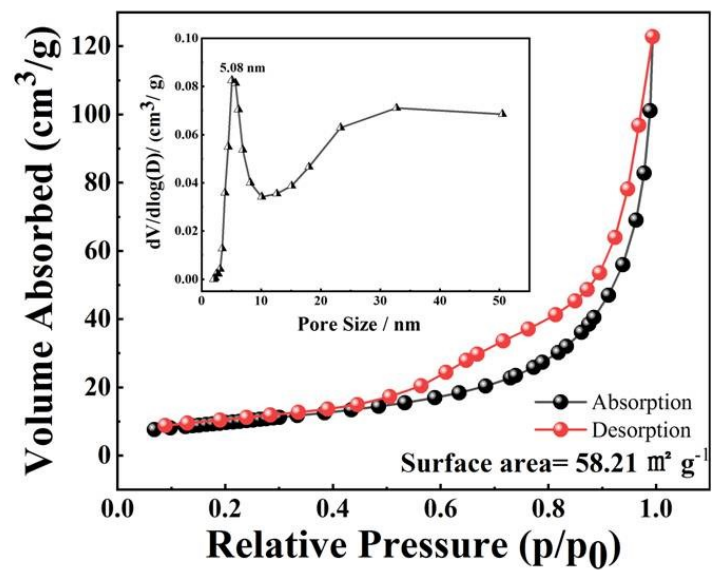

Figure S4. Nitrogen adsorption-desorption isotherms and the corresponding pore size distribution (inset) of  $\text{Cu}_{2-x}\text{Se}@\text{(Co,Cu)Se}_2$  core-shell structures.



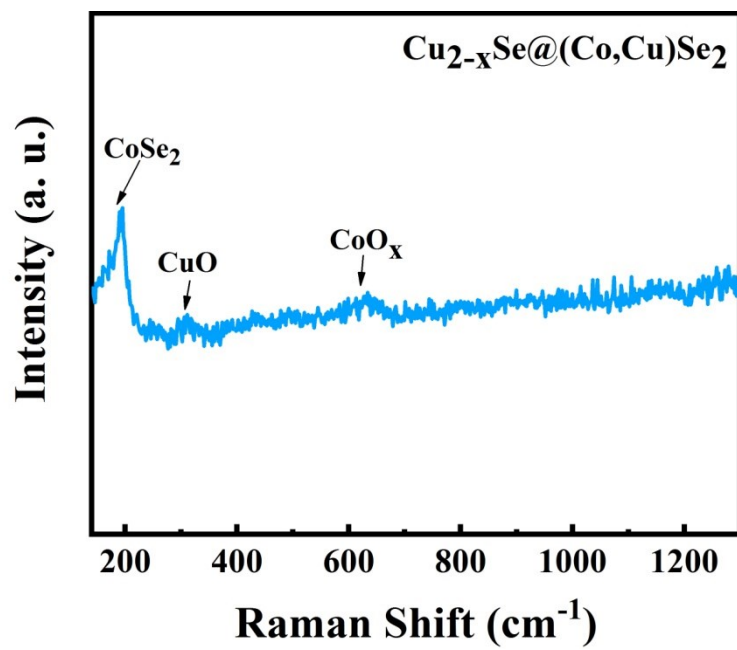

Figure S5. Raman spectrum of Cu<sub>2-x</sub>Se@(Co,Cu)Se<sub>2</sub> core-shell structures.

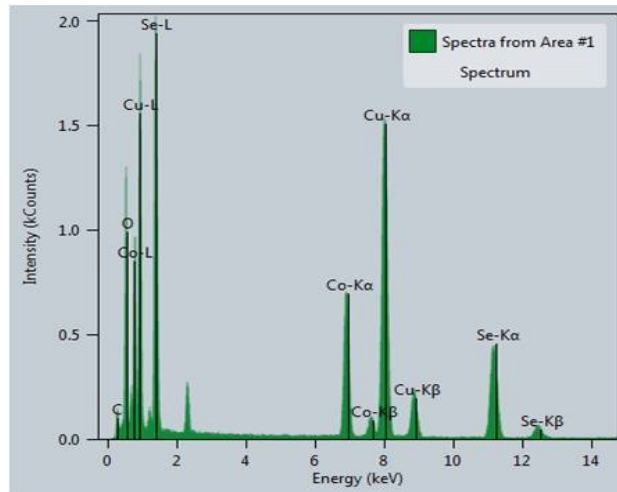

Figure S6. EDX spectrum of  $\text{Cu}_{2-x}\text{Se}@\text{(Co,Cu)Se}_2$  core-shell structures.

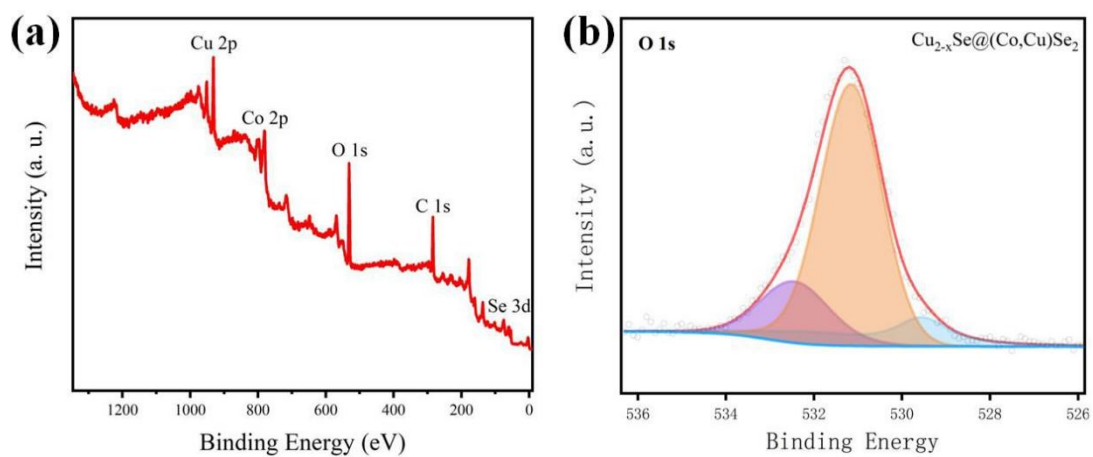

Figure S7. (a) XPS spectrum of  $\text{Cu}_{2-x}\text{Se}@\text{(Co,Cu)Se}_2$  core-shell structures, (b) High-resolution XPS spectra of O 1s for  $\text{Cu}_{2-x}\text{Se}@\text{(Co,Cu)Se}_2$  core-shell structures.

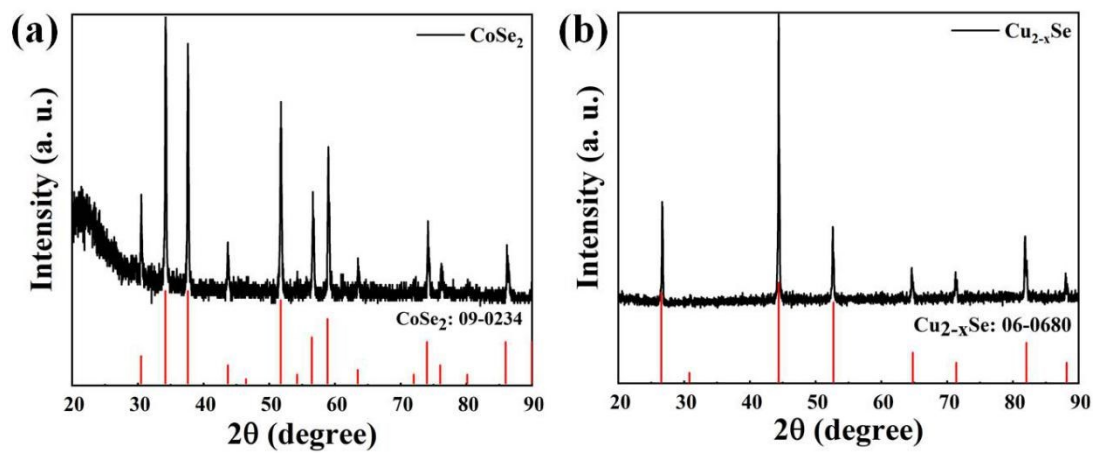

Figure S8. The XRD patterns of (a)  $\text{CoSe}_2$  and (b)  $\text{Cu}_{2-x}\text{Se}$ .

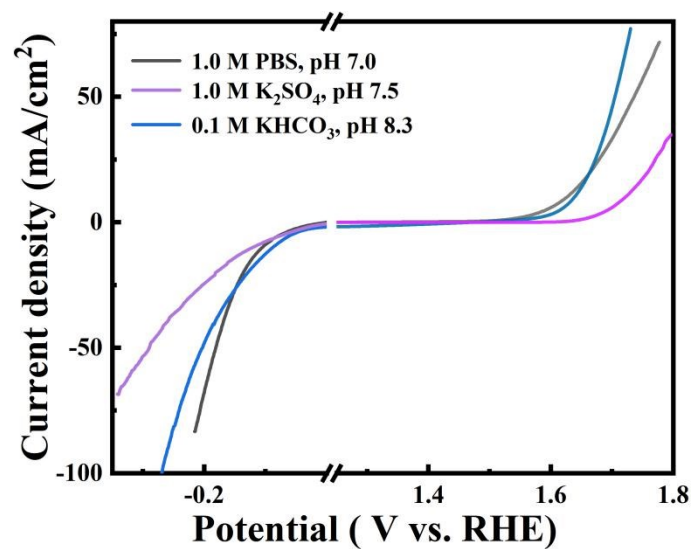

Figure S9. The linear sweep voltammetry (LSV) curves of Cu<sub>2-x</sub>Se@(Co,Cu)Se<sub>2</sub> catalyst for HER and OER in several neutral and near-neutral electrolyte, such as phosphate buffer solution (1.0 M PBS, pH 7), K<sub>2</sub>SO<sub>4</sub> solution (1.0 M, pH 7.5) and KHCO<sub>3</sub> solution (0.1 M, pH 8.3).

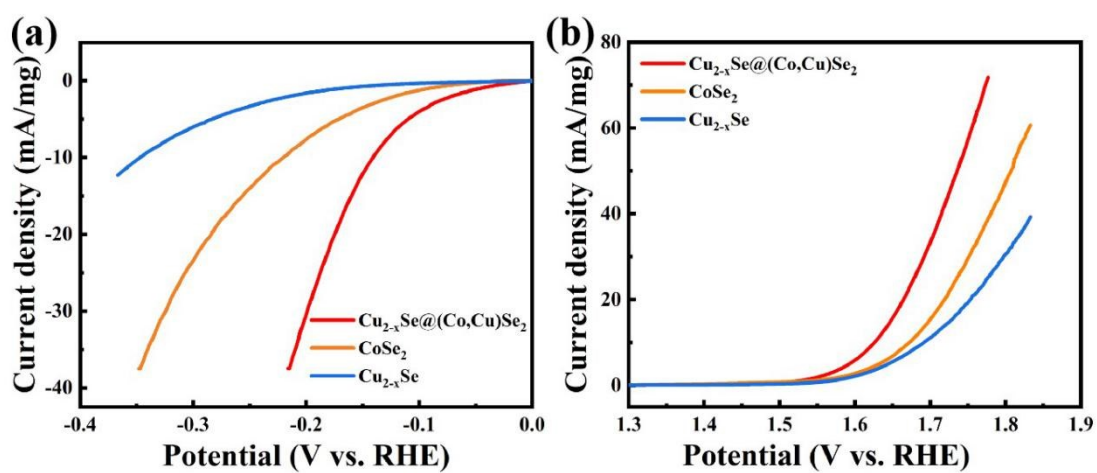

Figure S10. The mass activity of  $\text{Cu}_{2-x}\text{Se}@\text{(Co,Cu)Se}_2$ ,  $\text{CoSe}_2$ ,  $\text{Cu}_{2-x}\text{Se}$  catalysts for (a) HER process and (b) OER process. The mass loading is about 0.2 mg.

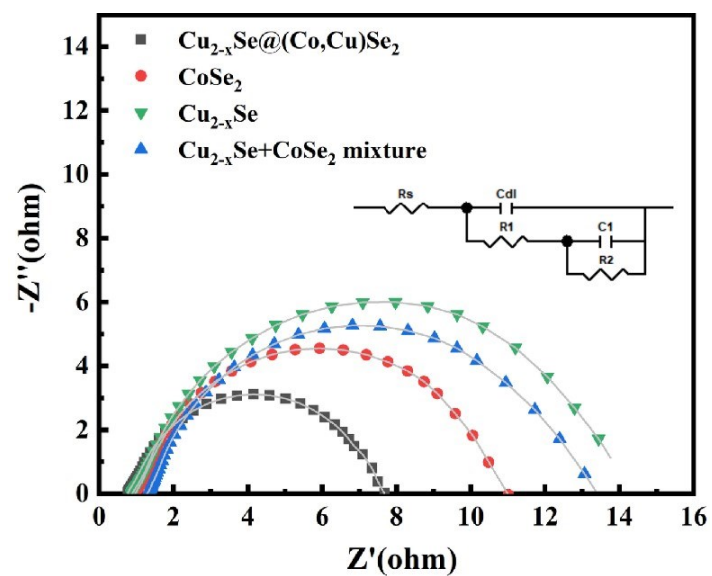

Figure S11. Nyquist plots of  $\text{Cu}_{2-x}\text{Se}@\text{(Co,Cu)Se}_2$ ,  $\text{CoSe}_2$ ,  $\text{Cu}_{2-x}\text{Se}$  and  $\text{Cu}_{2-x}\text{Se}+\text{CoSe}_2$  mixture for HER test. The scattered symbols represent the experimental results and the solid lines are simulation fitted results. The inset demonstrates the equivalent circuit for the simulation.

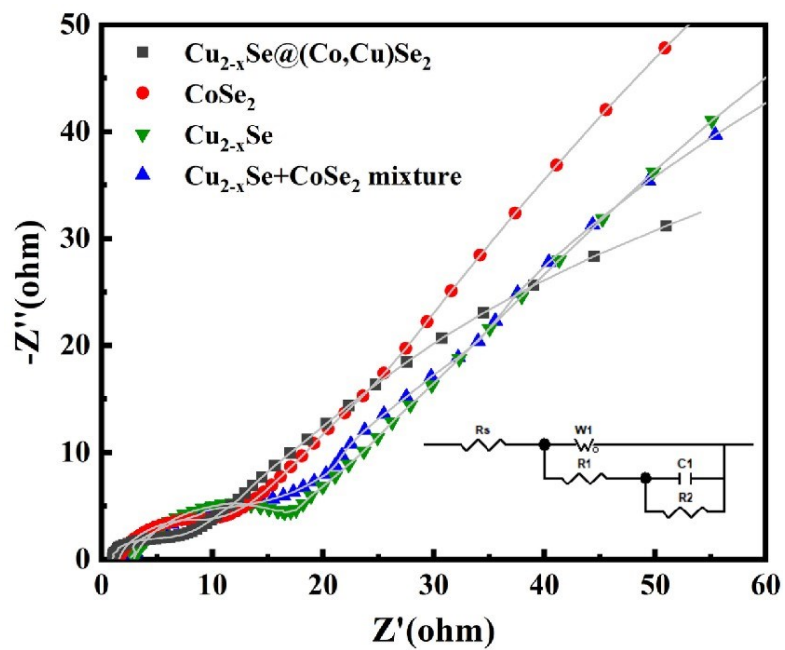

Figure S12. Nyquist plots of  $\text{Cu}_{2-x}\text{Se}@\text{(Co,Cu)Se}_2$ ,  $\text{CoSe}_2$ ,  $\text{Cu}_{2-x}\text{Se}$  and  $\text{Cu}_{2-x}\text{Se}+\text{CoSe}_2$  mixture for OER test. The scattered symbols represent the experimental results and the solid lines are simulation fitted results. The inset demonstrates the equivalent circuit for the simulation.



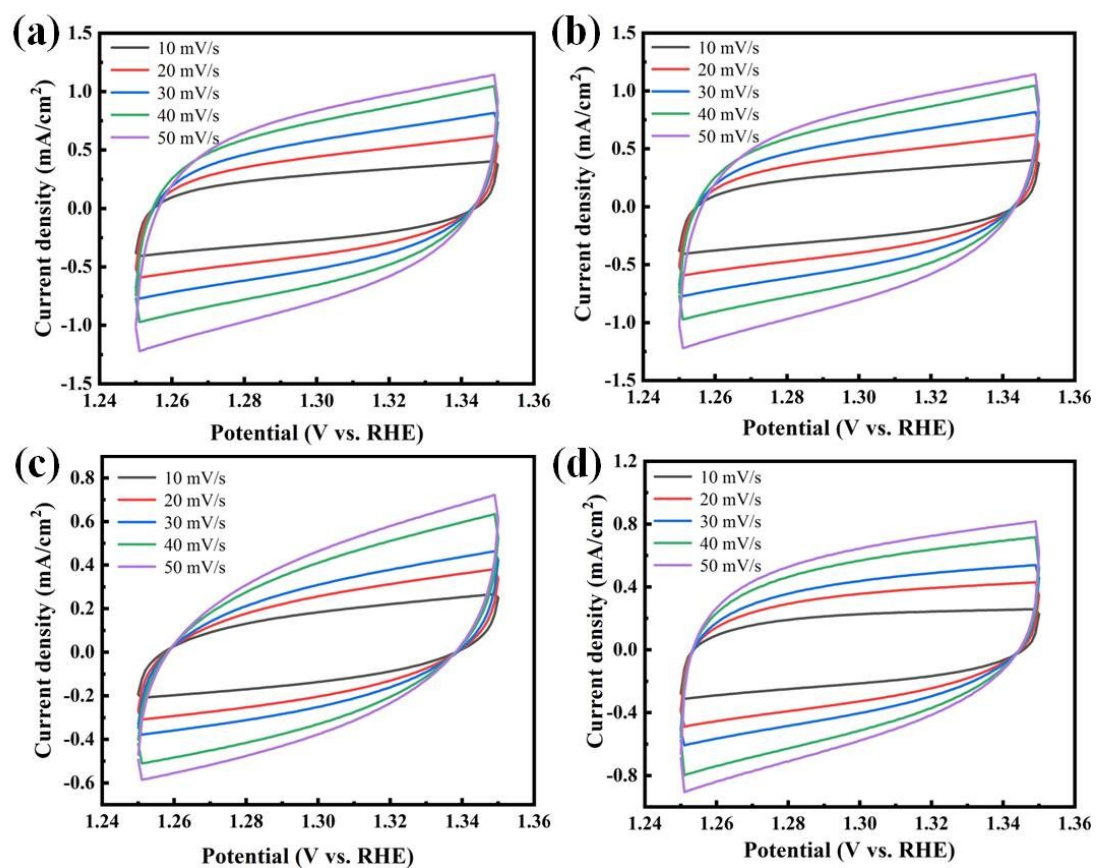

Figure S13. CV curves of (a)  $\text{Cu}_{2-x}\text{Se}@\text{(Co,Cu)Se}_2$ , (b)  $\text{CoSe}_2$ , (c)  $\text{Cu}_{2-x}\text{Se}$  and (d)  $\text{Cu}_{2-x}\text{Se}+\text{CoSe}_2$  mixture in the non-faradic current range at scan rates of 10~50 mV/s.

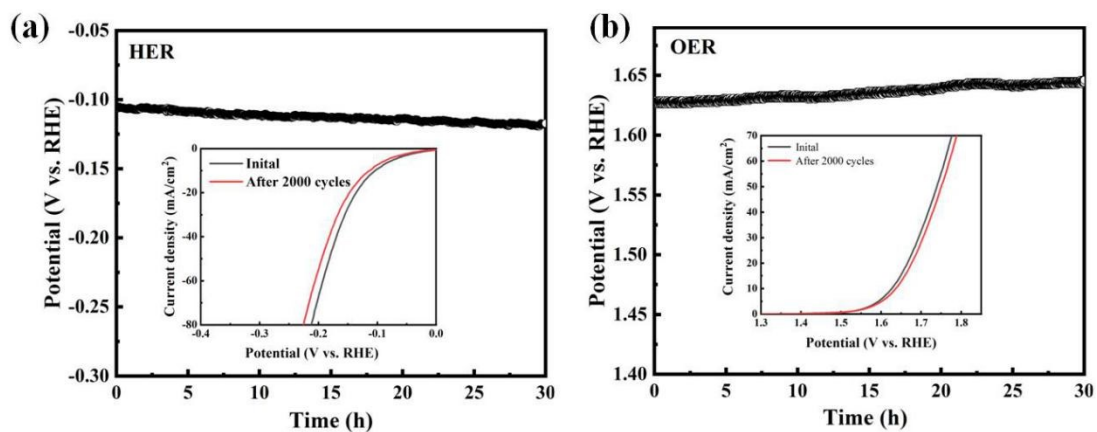

Figure S14. Long-term stability measurements of  $\text{Cu}_{2-x}\text{Se}@\text{(Co,Cu)Se}_2$  at (a)  $-10 \text{ mA/cm}^2$  for HER and (b)  $10 \text{ mA/cm}^2$  for OER. The inset is the corresponding CV curves of HER and OER, respectively, for 1<sup>st</sup> and 2000<sup>th</sup> cycles at a scan rate of  $2 \text{ mV/s}$  in  $1.0 \text{ M PBS}$  media.

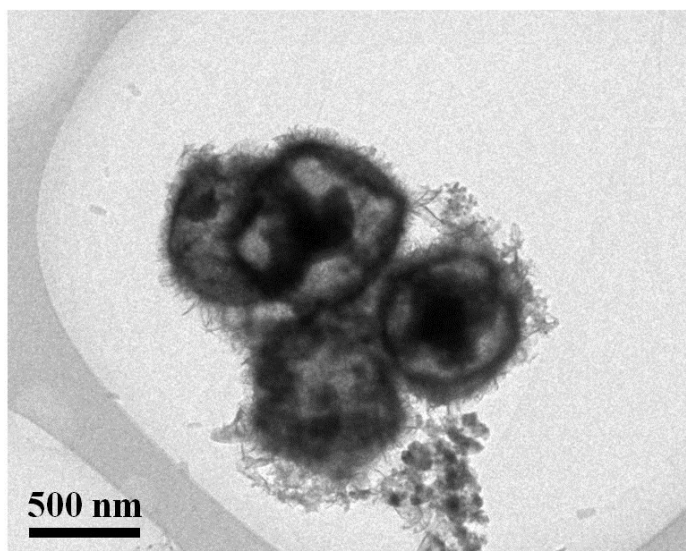

Figure S15. The low-magnification TEM image of  $\text{Cu}_{2-x}\text{Se}@\text{(Co,Cu)Se}_2$  core-shell structures after OER measurements.

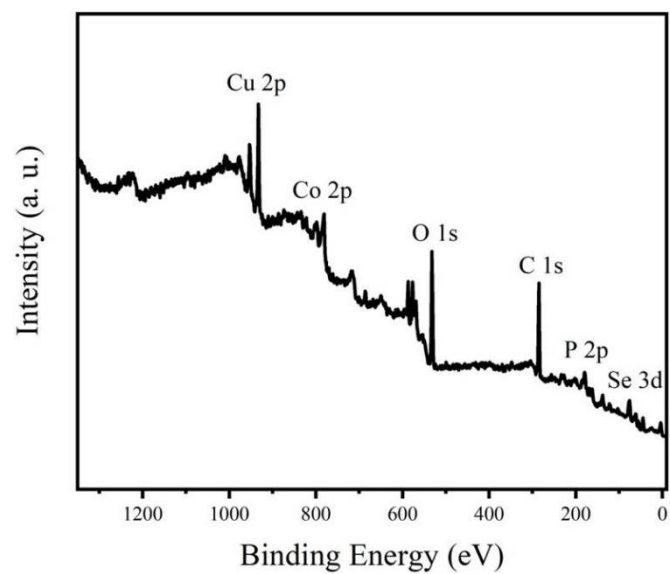

Figure S16. XPS spectrum of  $\text{Cu}_{2-x}\text{Se}@\text{(Co,Cu)Se}_2$  core-shell structures after OER tests.

Table S1. The atomic concentration of C, O, Co, Cu and Se elements in  $\text{Cu}_{2-x}\text{Se}@\text{(Co,Cu)Se}_2$  core-shell structure.

|                                                                          | Element | App  | Intensity | Weight% | Weight% | Atomic% |
|--------------------------------------------------------------------------|---------|------|-----------|---------|---------|---------|
| Materials                                                                |         | Conc | Corrn.    |         | Sigma   |         |
| $\text{Cu}_{2-x}\text{Se}@\text{(Co,Cu)Se}_2$<br>core-shell<br>structure | C K     | 0.16 | 0.0262    | 1.73    | 0.12    | 2.94    |
|                                                                          | O K     | 1.12 | 0.1837    | 10.56   | 0.09    | 11.67   |
|                                                                          | Cu K    | 7.45 | 1.05      | 20.53   | 0.94    | 23.66   |
|                                                                          | Co K    | 2.11 | 0.7913    | 11.87   | 0.74    | 4.64    |
|                                                                          | Se K    | 2.58 | 0.6122    | 55.31   | 4.83    | 57.09   |
|                                                                          | Totals  |      |           |         | 100.00  |         |

Table S2. The simulated  $R_{ct}$  values of  $\text{Cu}_{2-x}\text{Se}@\text{(Co,Cu)Se}_2$ ,  $\text{CoSe}_2$ ,  $\text{Cu}_{2-x}\text{Se}$  and  $\text{Cu}_{2-x}\text{Se}+\text{CoSe}_2$  catalysts for HER test.

| Catalysts             | $\text{Cu}_{2-x}\text{Se}@\text{(Co,Cu)Se}_2$ | Bare $\text{CoSe}_2$ | Bare $\text{Cu}_{2-x}\text{Se}$ | $\text{Cu}_{2-x}\text{Se}+\text{CoSe}_2$<br>mixture |
|-----------------------|-----------------------------------------------|----------------------|---------------------------------|-----------------------------------------------------|
| $R_{ct}$ ( $\Omega$ ) | 6.104                                         | 10.005               | 13.926                          | 13.188                                              |

Table S3. The simulated  $R_{ct}$  values of  $\text{Cu}_{2-x}\text{Se}@\text{(Co,Cu)Se}_2$ ,  $\text{CoSe}_2$ ,  $\text{Cu}_{2-x}\text{Se}$  and  $\text{Cu}_{2-x}\text{Se}+\text{CoSe}_2$  catalysts for OER test.

| Catalysts             | $\text{Cu}_{2-x}\text{Se}@\text{(Co,Cu)Se}_2$ | Bare $\text{CoSe}_2$ | Bare $\text{Cu}_{2-x}\text{Se}$ | $\text{Cu}_{2-x}\text{Se}+\text{CoSe}_2$<br>mixture |
|-----------------------|-----------------------------------------------|----------------------|---------------------------------|-----------------------------------------------------|
| $R_{ct}$ ( $\Omega$ ) | 7.037                                         | 15.421               | 18.414                          | 27.895                                              |

Table S4. Comparison of HER catalytic performance in neutral-pH media with other non-noble metal catalysts on recently available literatures.

| Catalyst                                                           | Electrolyte (PBS) | Tafel slope (mV/dec) | Overpotential ( $\eta_{10}$ ) (mV) | Reference        |
|--------------------------------------------------------------------|-------------------|----------------------|------------------------------------|------------------|
| Ni <sub>0.1</sub> Co <sub>0.9</sub> P                              | 1 M               | 103                  | 125                                | 1                |
| S-NiFe <sub>2</sub> O <sub>4</sub> /NF                             | 1 M               | 81.3                 | 197                                | 2                |
| Ni <sub>0.89</sub> Co <sub>0.11</sub> Se <sub>2</sub>              | 1 M               | 78                   | 88                                 | 3                |
| Cu-CoP NAs/CP                                                      | 1 M               | 83.5                 | 81                                 | 4                |
| Ni-Co-P-H                                                          | 0.5 M             | 84                   | 157                                | 5                |
| Co/CoP-5                                                           | 1 M               | 72.3                 | 138                                | 6                |
| Karst NF                                                           | 1 M               | 99                   | 110                                | 7                |
| Cu <sub>3</sub> N-Cu <sub>3</sub> P/NPSCNWs@NF                     | 1 M               | 124                  | 109                                | 8                |
| CoP/CC                                                             | 1 M               | 129                  | 106                                | 9                |
| PD-CoP UNSs/CC                                                     | 1 M               | 101                  | 90                                 | 10               |
| SiO <sub>2</sub> /PPy NTs-CFs                                      | 1 M               | 100.2                | 183                                | 11               |
| np-Co <sub>9</sub> S <sub>8</sub>                                  | 1 M               | 118                  | 264                                | 12               |
| $\beta$ -Cu <sub>2</sub> S/CF                                      | 1 M               | 125.5                | 190                                | 13               |
| CoO/CoSe <sub>2</sub>                                              | 0.5M              | 131                  | 337                                | 14               |
| 1%CoS <sub>2</sub> -9% CuS                                         | 0.5M              | 90                   | 89                                 | 15               |
| Co <sub>9</sub> S <sub>8</sub> /Ni <sub>3</sub> S <sub>2</sub> /NF | 1 M               | 82                   | 330                                | 16               |
| Fe <sub>10</sub> Co <sub>40</sub> Ni <sub>40</sub> P               | 1 M               | 132                  | 300                                | 17               |
| Ni(S <sub>0.5</sub> Se <sub>0.5</sub> ) <sub>2</sub>               | 1 M               | 81                   | 124                                | 18               |
| FeP/Co <sub>3</sub> (PO <sub>4</sub> ) <sub>2</sub>                | 1 M               | 81                   | 117                                | 19               |
| CoP/Co <sub>2</sub> P@NC-2                                         | 1M                | ---                  | 498                                | 20               |
| RuCo@CDs                                                           | 1M                | 67                   | 171                                | 21               |
| <b>Cu<sub>2-x</sub>Se@(Co,Cu)Se<sub>2</sub></b>                    | <b>1 M</b>        | <b>81</b>            | <b>106</b>                         | <b>This work</b> |



Table S5. Comparison of OER catalytic performance in neutral-pH media with other non-noble metal catalysts on recently available literatures.

| Catalyst                                                           | Electrolyte (PBS) | Tafel slope (mV/dec) | Overpotential ( $\eta_{10}$ ) (mV) | Reference        |
|--------------------------------------------------------------------|-------------------|----------------------|------------------------------------|------------------|
| Ni <sub>0.1</sub> Co <sub>0.9</sub> P                              | 1 M               | 133                  | 570                                | 22               |
| RhCo-ANAs                                                          | 1 M               | 139                  | 310                                | 23               |
| S-NiFe <sub>2</sub> O <sub>4</sub> /NF                             | 1 M               | 118.1                | 494                                | 2                |
| CoO <sub>x</sub> H <sub>y</sub> /CC                                | 0.1 M             | 121                  | 430@38mA/cm <sup>2</sup>           | 24               |
| FeNi-P/NF-A                                                        | 0.1 M             | 136                  | 429                                | 25               |
| Cu <sub>0.08</sub> Co <sub>0.92</sub> P/CP                         | 1 M               | 83.5                 | 411                                | 4                |
| Karst NF                                                           | 1 M               | 249                  | 432                                | 7                |
| CoO/CoSe <sub>2</sub> /Ti                                          | 0.5 M             | 198                  | 510                                | 14               |
| CoO/Co <sub>4</sub> N                                              | 1 M               | 83                   | 398                                | 26               |
| Co <sub>9</sub> S <sub>8</sub> /Ni <sub>3</sub> S <sub>2</sub> /NF | 1 M               | 226                  | 495                                | 16               |
| Co-Pi NA/Ti                                                        | 0.1 M             | 187                  | 380                                | 27               |
| Co <sub>3</sub> S <sub>4</sub> /AC                                 | 1 M               | 170                  | 360                                | 28               |
| Fe <sub>10</sub> Co <sub>40</sub> Ni <sub>40</sub> P               | 1 M               | 246                  | 466                                | 17               |
| Ni <sub>3</sub> Se <sub>4</sub> @Ni foam                           | 1 M               | 116                  | 480                                | 18               |
| Ni(S <sub>0.5</sub> Se <sub>0.5</sub> ) <sub>2</sub>               | 1 M               | 94                   | 501                                | 29               |
| FeP/Co <sub>3</sub> (PO <sub>4</sub> ) <sub>2</sub>                | 1 M               | 301                  | 504                                | 19               |
| RuCo@CDs                                                           | 1 M               | 147.4                | 410                                | 21               |
| <b>Cu<sub>2-x</sub>Se@(Co,Cu)Se<sub>2</sub></b>                    | <b>1 M</b>        | <b>102</b>           | <b>396</b>                         | <b>This work</b> |

Table S6. Performance comparison of overall water splitting with other systems in neutral-pH electrolyte.

| Catalyst                                                                             | Electrolyte (PBS) | Cell voltage at 10 mA cm <sup>2</sup> (V) | Reference        |
|--------------------------------------------------------------------------------------|-------------------|-------------------------------------------|------------------|
| Ni <sub>0.1</sub> Co <sub>0.9</sub> P                                                | 1 M               | 1.89                                      | 1                |
| RhCo-ANAs/CF                                                                         | 1 M               | 1.58                                      | 23               |
| S-NiFe <sub>2</sub> O <sub>4</sub> /NF                                               | 1 M               | 1.95                                      | 2                |
| Cu-CoP NAs/CP                                                                        | 1 M               | 1.72                                      | 4                |
| A- P- CoMoO <sub>4</sub>    NiFeDH                                                   | 1 M               | 1.74                                      | 30               |
| Karst NF                                                                             | 1 M               | 1.88                                      | 7                |
| Cu <sub>3</sub> N-Cu <sub>3</sub> P/NPSCNWS@NF                                       | 1 M               | 1.54                                      | 8                |
| np-Co <sub>9</sub> S <sub>4</sub> P                                                  | 1 M               | 1.67                                      | 12               |
| CoO/CoSe <sub>2</sub> -Ti                                                            | 0.5 M             | 2.18                                      | 14               |
| CoO/Co <sub>4</sub> N                                                                | 1 M               | 1.79                                      | 26               |
| MoS <sub>2</sub> /Co <sub>9</sub> S <sub>8</sub> /Ni <sub>3</sub> S <sub>2</sub> /Ni | 1 M               | 1.80                                      | 16               |
| Co-Pi NA/Ti                                                                          | 1 M               | 1.82                                      | 27               |
| Fe <sub>x</sub> Co <sub>y</sub> Ni <sub>z</sub> P                                    | 1 M               | 1.57                                      | 17               |
| Ni(S <sub>0.5</sub> Se <sub>0.5</sub> ) <sub>2</sub>                                 | 1 M               | 1.87                                      | 29               |
| FeP/Co <sub>3</sub> (PO <sub>4</sub> ) <sub>2</sub>                                  | 1 M               | 1.82                                      | 19               |
| RuCo@CDs                                                                             | 1 M               | 1.64                                      | 21               |
| <b>Cu<sub>2-x</sub>Se@(Co,Cu)Se<sub>2</sub></b>                                      | <b>1M</b>         | <b>1.73</b>                               | <b>This work</b> |

## Notes and Reference

1. R. Wu, B. Xiao, Q. Gao, Y.-R. Zheng, X.-S. Zheng, J.-F. Zhu, M.-R. Gao and S.-H. Yu, *Angew. Chem. Int. Ed.*, 2018, **57**, 15445-15449.
2. J. Liu, D. Zhu, T. Ling, A. Vasileff and S.-Z. Qiao, *Nano Energy*, 2017, **40**, 264-273.
3. B. Liu, Y.-F. Zhao, H.-Q. Peng, Z.-Y. Zhang, C.-K. Sit, M.-F. Yuen, T.-R. Zhang, C.-S. Lee and W.-J. Zhang, *Adv. Mater.*, 2017, **29**, 1606521.
4. L. Yan, B. Zhang, J. Zhu, Y. Li, P. Tsiakaras and P. Kang Shen, *Appl. Catal. B: Environ.*, 2020, **265**, 118555.
5. X. Liu, S. Deng, D. Xiao, M. Gong, J. Liang, T. Zhao, T. Shen and D. Wang, *ACS Appl. Mater. Interfaces*, 2019, **11**, 42233-42242.
6. Z.-H. Xue, H. Su, Q.-Y. Yu, B. Zhang, H.-H. Wang, X.-H. Li and J.-S. Chen, *Adv. Energy Mater.*, 2017, **7**, 1602355.
7. X. Q. Gao, Y. D. Chen, T. Sun, J. M. Huang, W. Zhang, Q. Wang and R. Cao, *Energy Environ. Sci.*, 2020, **13**, 174-182.
8. Q. J. Wang, Z. Y. Zhang, X. Z. Zhao, J. W. Xiao, D. Manoj, F. F. Wei, F. Xiao, H. R. Wang and S. Wang, *Chemelectrochem*, 2020, **7**, 289-298.
9. J. Q. Tian, Q. Liu, A. M. Asiri and X. P. Sun, *J. Am. Chem. Soc.*, 2014, **136**, 7587-7590.
10. Y. L. Dang, J. K. He, T. L. Wu, L. P. Yu, P. Kerns, L. Y. Wen, J. Ouyang and S. L. Suib, *ACS Appl. Mater. Interfaces*, 2019, **11**, 29879-29887.
11. J.-X. Feng, H. Xu, S.-H. Ye, G. Ouyang, Y.-X. Tong and G.-R. Li, *Angew. Chem. Int. Ed.*, 2017, **56**, 8120-8124.
12. Y. W. Tan, M. Luo, P. Liu, C. Cheng, J. H. Han, K. Watanabe and M. W. Chen, *ACS Appl. Mater. Interfaces*, 2019, **11**, 3880-3888.
13. M. H. Fan, R. Q. Gao, Y. C. Zou, D. J. Wang, N. Bai, G. D. Li and X. X. Zou, *Electrochim. Acta*, 2016, **215**, 366-373.
14. K. D. Li, J. F. Zhang, R. Wu, Y. F. Yu and B. Zhang, *Adv. Sci.*, 2016, **3**, 1500426.
15. M. C. Li, Y. T. Qian, J. M. Du, H. R. Wu, L. Y. Zhang, G. Li, K. D. Li, W. M. Wang and D. J. Kang, *ACS Sustainable Chem. Eng.*, 2019, **7**, 14016-14022.
16. Y. Yang, H. Q. Yao, Z. H. Yu, S. M. Islam, H. Y. He, M. W. Yuan, Y. H. Yue, K. Xu, W. C. Hao, G. B. Sun, H. F. Li, S. L. Ma, P. Zapol and M. G. Kanatzidis, *J. Am. Chem. Soc.*, 2019, **141**, 10417-10430.
17. Z. Zhang, J. H. Hao, W. S. Yang and J. L. Tang, *RSC Adv.*, 2016, **6**, 9647-9655.
18. S. Anantharaj, J. Kennedy and S. Kundu, *ACS Appl. Mater. Interfaces*, 2017, **9**, 8714-8728.
19. H. X. Liu, X. Y. Peng, X. J. Liu, G. C. Qi and J. Luo, *Chemsuschem*, 2019, **12**, 1334-1341.
20. X. W. Lv, J. T. Ren, Y. S. Wang, Y. P. Liu and Z. Y. Yuan, *ACS Sustainable Chem. Eng.*, 2019, **7**, 8993-9001.
21. T. L. Feng, G. T. Yu, S. Y. Tao, S. J. Zhu, R. Q. Ku, R. Zhang, Q. S. Zeng, M. X. Yang, Y. X. Chen, W. H. Chen, W. Chen and B. Yang, *J. Mater. Chem. A*, 2020, **8**, 9638-9645.
22. R. Wu, B. Xiao, Q. Gao, Y. R. Zheng, X. S. Zheng, J. F. Zhu, M. R. Gao and S. H. Yu, *Angew. Chem., Int. Ed.*, 2018, **57**, 15445-15449.
23. Y. Zhao, J. Bai, X. R. Wu, P. Chen, P. J. Jin, H. C. Yao and Y. Chen, *J. Mater. Chem. A*, 2019, **7**, 16437-16446.
24. M. Q. Chen, Y. Y. Xie, J. X. Wu, H. F. Huang, J. Teng, D. W. Wang, Y. N. Fan, J. J. Jiang, H. P. Wang and C. Y. Su, *J. Mater. Chem. A*, 2019, **7**, 10217-10224.
25. B. W. Zhang, Y. H. Lui, L. Zhou, X. H. Tang and S. Hu, *J. Mater. Chem. A*, 2017, **5**, 13329-13335.
26. R. Q. Li, P. F. Hu, M. Miao, Y. L. Li, X. F. Jiang, Q. Wu, Z. Meng, Z. Hu, Y. Bando and X. B. Wang, *J. Mater. Chem. A*, 2018, **6**, 24767-24772.
27. L. S. Xie, R. Zhang, L. Cui, D. N. Liu, S. Hao, Y. J. Ma, G. Du, A. M. Asiri and X. P. Sun, *Angew. Chem. Int. Ed.*, 2017, **56**, 1064-1068.
28. M. Chauhan and S. Deka, *ACS Appl. Energy Mater.*, 2020, **3**, 977-986.
29. L. Y. Zeng, K. A. Sun, Y. J. Chen, Z. Liu, Y. J. Chen, Y. Pan, R. Y. Zhao, Y. Q. Liu and C. G. Liu, *J. Mater. Chem. A*, 2019, **7**, 16793-16802.

30. X. Cui, Y. Cui, M. L. Chen, R. Xiong, Y. C. Huang and X. W. Liu, *ACS Appl. Mater. Interfaces*, 2020, **12**, 30905-30914.
